# Supplementary material
Source: PubMed Central journal article supplement (PMC6819144)
Supplement: jci-129-127959-s320.pdf [file jci-129-127959-s320.pdf]

**Supplemental Information:**

**Figure S1**

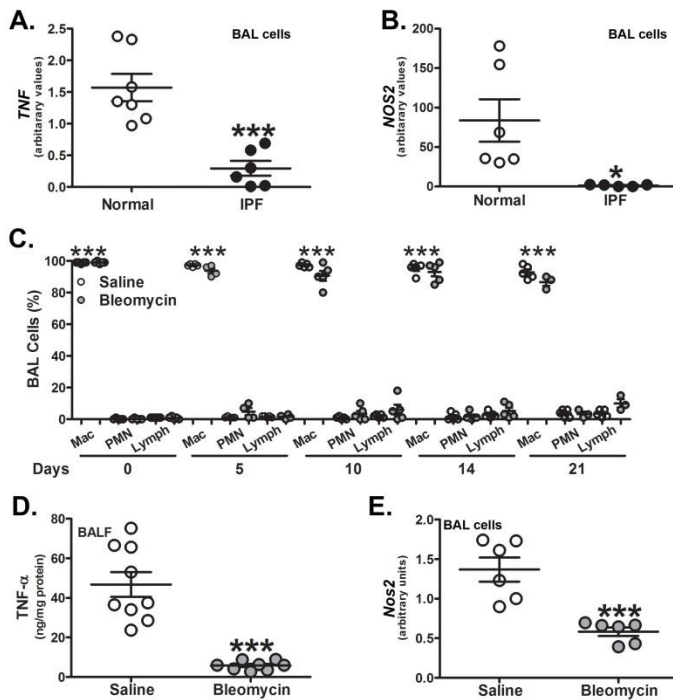

**Supplemental Figure 1. Classically activated macrophages are down-regulated in IPF BAL cells.** (A) *TNF* (B) and *NOS2* mRNA expression in BAL cells from normal ( $n = 6-7$ ) or IPF subjects ( $n = 5-6$ ). (C) Cell differential from saline and bleomycin-exposed WT mice at indicated time points ( $n = 3-5$  per time point). (D) *TNF-α* was measured in BALF from saline ( $n = 9$ ) or bleomycin-exposed mice ( $n = 8$ ). (E) *Nos2* mRNA expression in BAL cells from saline ( $n = 6$ ) or bleomycin-exposed mice ( $n = 6$ ). \*,  $p < 0.05$ ; \*\*\*,  $p < 0.0001$ . Values shown as mean  $\pm$  S.E.M. Two-tailed *t*-test statistical analysis was utilized for a, b, d, e. One-way ANOVA followed by Tukey's multiple comparison test was utilized for c.

**Figure S2**

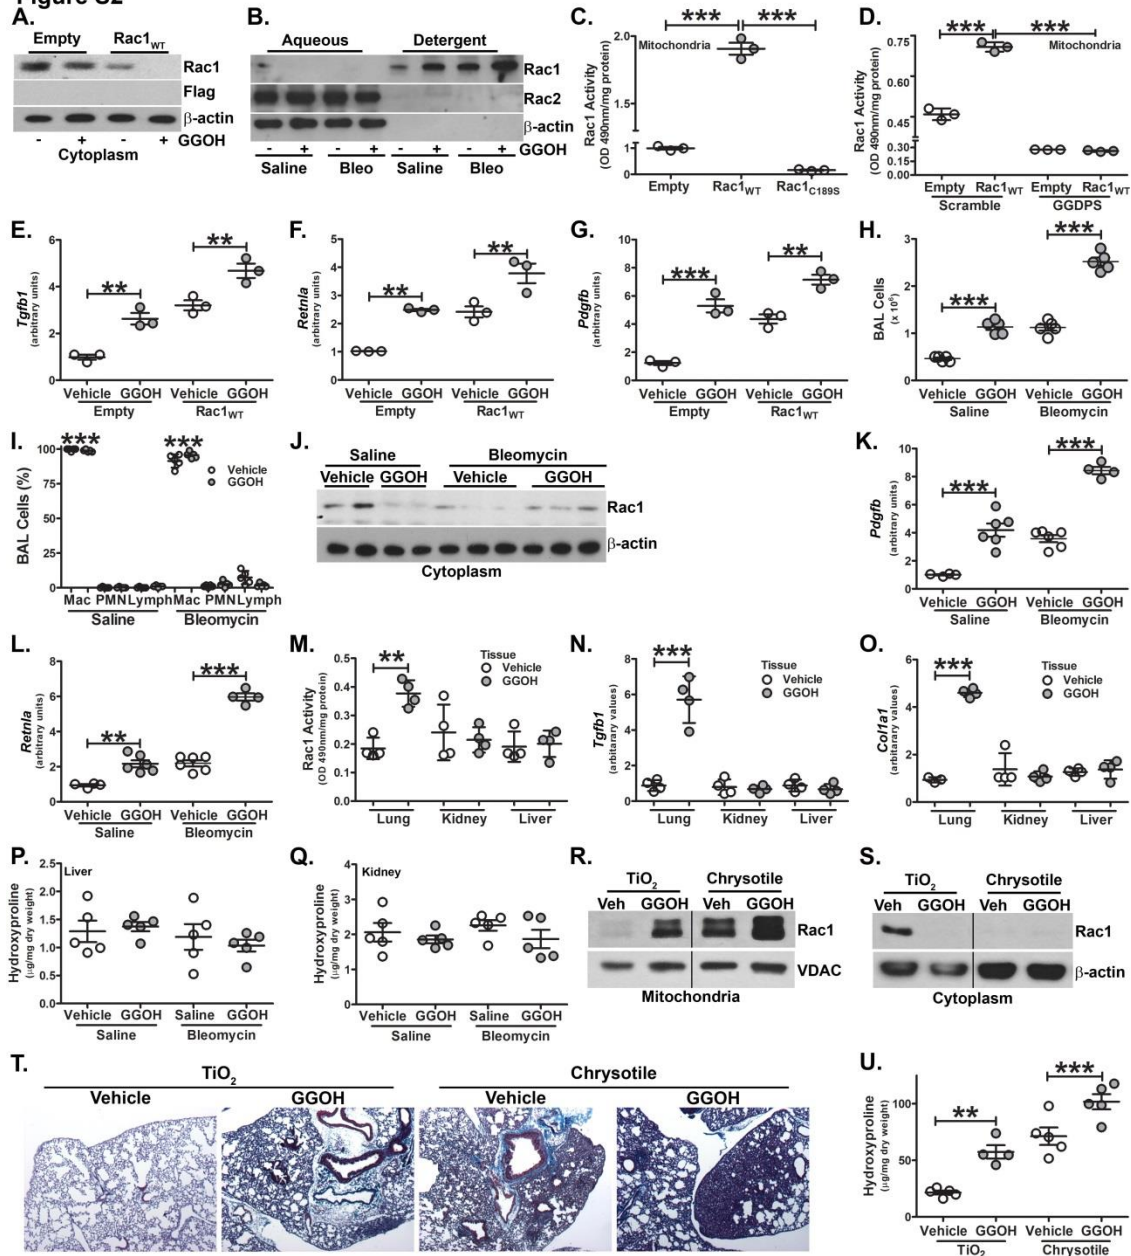

**Supplemental Figure 2. GGOH promotes lung fibrosis in the absence of injury.** (A) Immunoblot analysis in the cytoplasmic fraction from macrophages expressing empty or Rac1<sub>WT</sub> treated with vehicle or GGOH (50 μM). (B) Transfected THP-1 cells were treated with vehicle or GGOH and separated into aqueous (unprenylated) or detergent (prenylated) fractions. Mitochondrial Rac1 activity in transfected THP-1 cells expressing (C) empty, Rac1<sub>WT</sub>, or Rac1<sub>C189S</sub> and (D) scramble or GGDPS siRNA and empty or Rac1<sub>WT</sub>. mRNA expression for (E) *Tgfb1* ( $n = 3$ ), (F) *Retnla* ( $n = 3$ ) and (G) *Pdgfb* ( $n = 3$ ) in MH-S cells expressing empty or Rac1<sub>WT</sub> treated with vehicle or GGOH. Ten days after exposure of WT mice to saline or bleomycin, pumps containing vehicle or GGOH were implanted subcutaneously; mice were sacrificed 11 days later. (H) Total number of cells and (I) cell differential from BAL ( $n = 5$  per

group). **(J)** Cytoplasmic Rac1 immunoblot analysis in isolated monocyte-derived macrophages. mRNA expression for **(K)** *Pdgfb* and **(L)** *Retnla* (saline, vehicle  $n = 4$ ; saline, GGOH  $n = 6$ ; bleomycin, vehicle  $n = 6$ ; bleomycin, GGOH  $n = 4$ ). **(M)** Rac1 activity and **(N)** *Tgfb1* and **(O)** *Colla1* mRNA expression in tissue isolated from saline-exposed WT mice treated with GGOH via osmotic pumps ( $n = 4$  per group). Hydroxyproline analysis of **(P)** liver and **(Q)** kidney ( $n = 5$  per group). WT mice were exposed to  $\text{TiO}_2$  or chrysotile asbestos, pumps containing vehicle or GGOH were implanted subcutaneously 10 days after exposure; mice were sacrificed 11 days later. Rac1 immunoblot analysis in isolated monocyte-derived macrophages from **(R)** mitochondrial and **(S)** cytoplasmic fractions. **(T)** Representative lung histology with Masson's Trichrome staining ( $n = 5$  per group) with 2.5x magnification and **(U)** hydroxyproline content ( $n = 4-5$  per group). \*\*,  $p < 0.001$ ; \*\*\*,  $p < 0.0001$ . Values shown as mean  $\pm$  S.E.M. One-way ANOVA followed by Tukey's multiple comparison test was utilized.

**Figure S3**

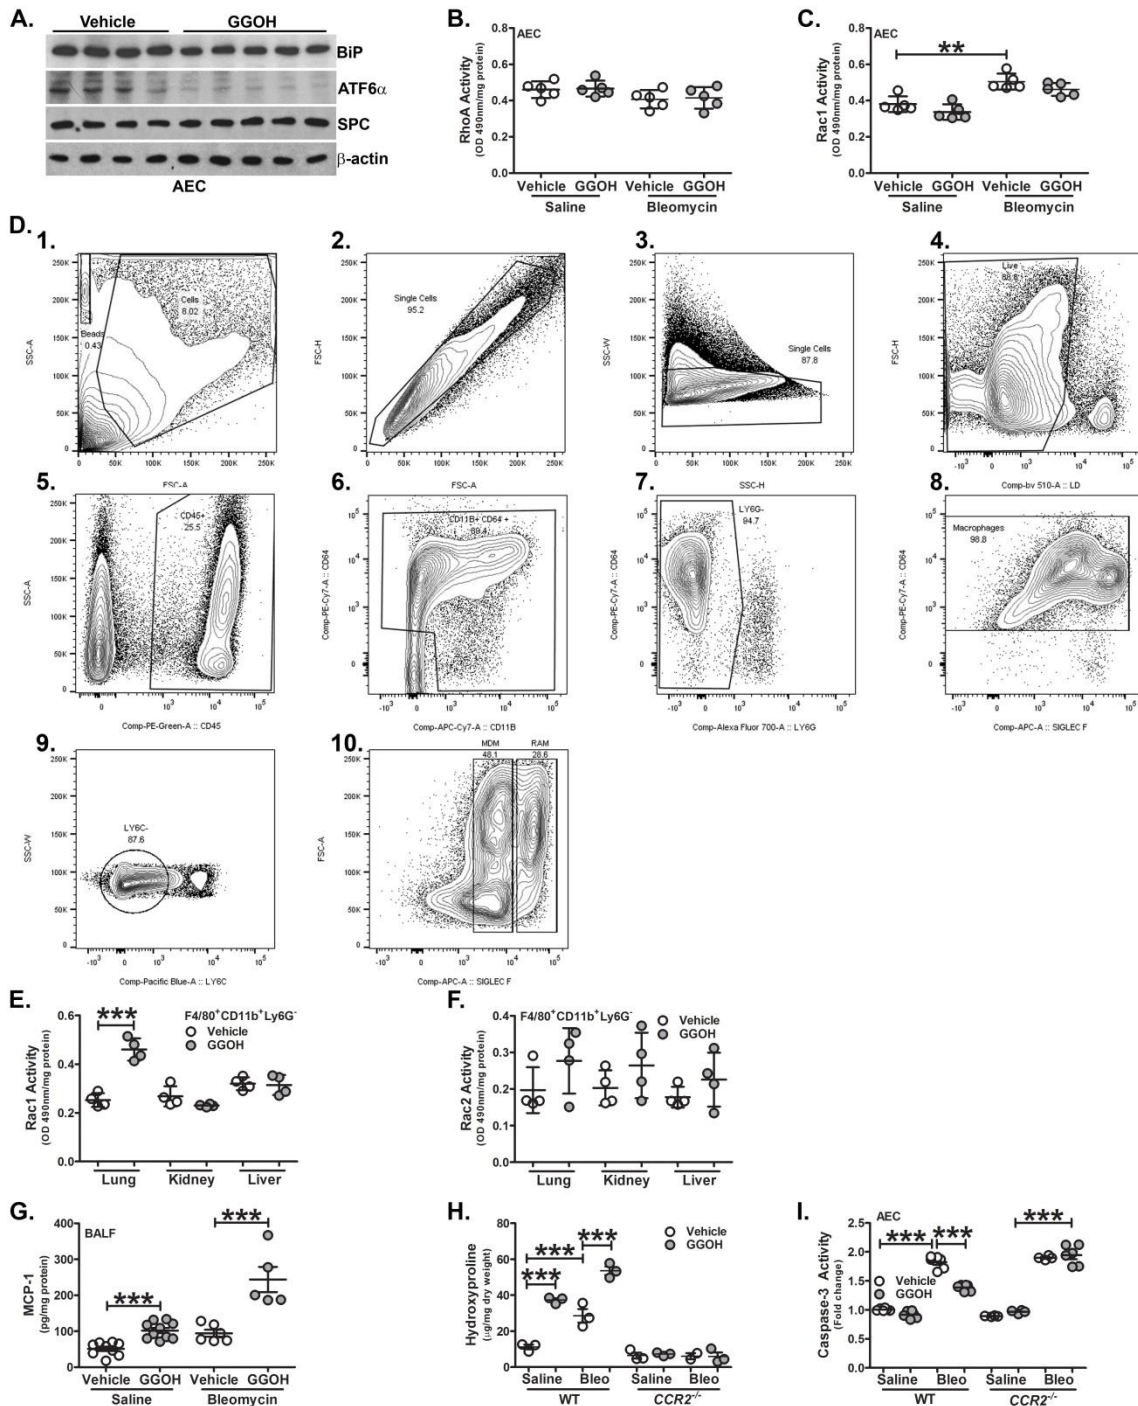

**Supplemental Figure 3. GGOH-mediated lung fibrosis requires monocyte-derived macrophages.** (A) Immunoblot analysis in alveolar epithelial cells (AECs) isolated from vehicle or GGOH treated mice (vehicle,  $n = 4$ ; GGOH,  $n = 5$ ). (B) RhoA and (C) Rac1 activity in AECs isolated from WT mice exposed to saline or bleomycin, 10 days after exposure pumps containing vehicle or GGOH were subcutaneously implanted; mice were sacrificed 11 days later. Ten days after exposure of WT mice to saline or bleomycin, pumps containing vehicle or GGOH were subcutaneously implanted; mice were sacrificed 11 days later. (D) Gating strategy used for flow

cytometry to sort monocyte populations in bleomycin-exposed WT mice treated with GGOH. (E) Rac1 and (F) Rac2 activity from F4/80<sup>+</sup>, CD11b<sup>+</sup>, and Ly6G<sup>-</sup> sorted cells from saline-exposed WT mice treated with GGOH via osmotic pump ( $n = 4$  per group). (G) MCP-1 measured in BALF ( $n = 5-10$  per group). WT and *CCR2*<sup>-/-</sup> mice were exposed and treated as described above. (H) Hydroxyproline in lung tissue ( $n = 3$  per group). (I) Caspase-3 activity in isolated AECs ( $n = 4-6$  per group). \*\*,  $p < 0.001$ ; \*\*\*,  $p < 0.0001$ . Values shown as mean  $\pm$  S.E.M. One-way ANOVA followed by Tukey's multiple comparison test was utilized.

**Figure S4**

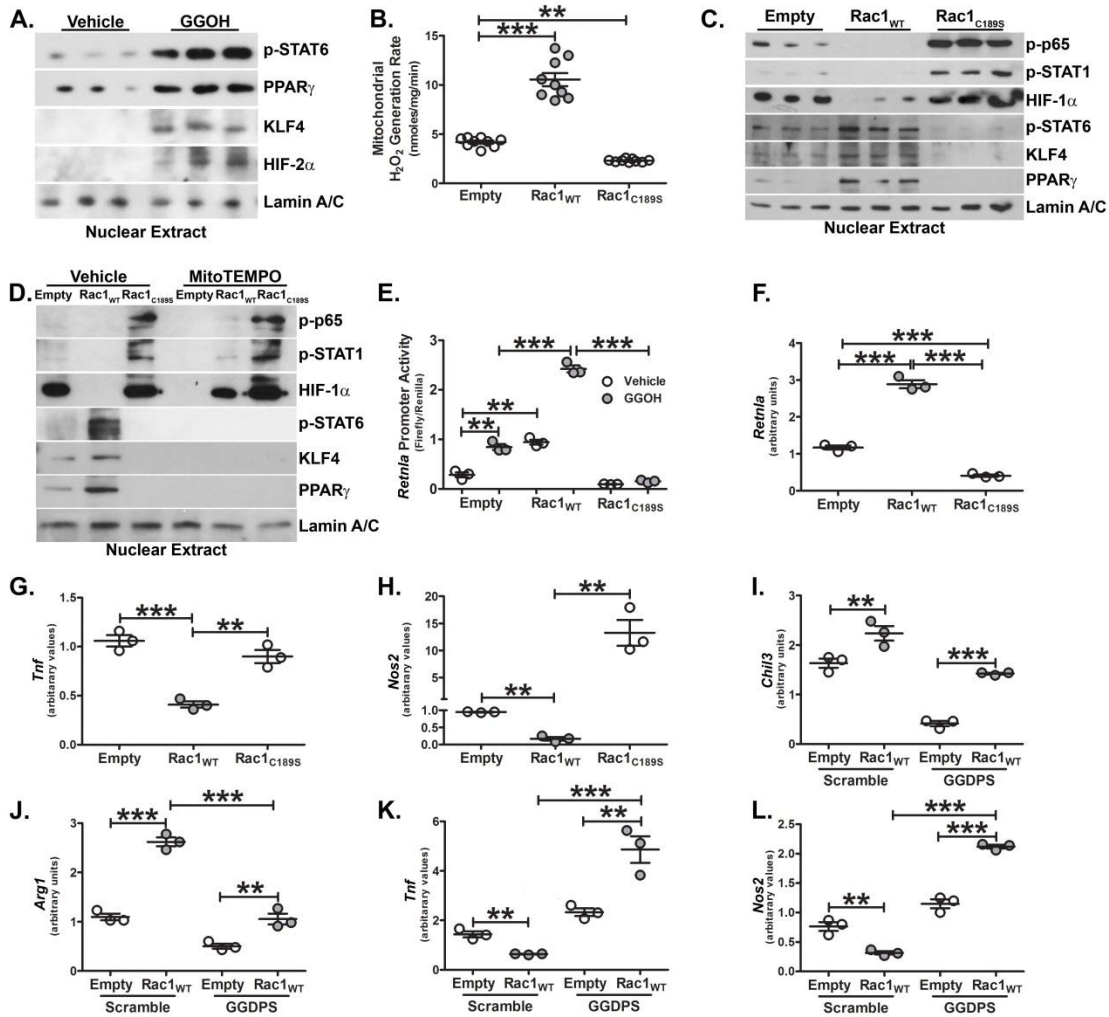

**Supplemental Figure 4. GGOH promotes profibrotic polarization of macrophages.** (A) Immunoblot analysis in the nuclear fraction from macrophages treated with vehicle or GGOH (50  $\mu$ M). (B) MtROS generation in transfected THP-1 cells treated with vehicle or GGOH ( $n = 3$ ). (C) Immunoblot analysis in transfected MH-S cells. (D) Immunoblot analysis in transfected MH-S cells treated with vehicle or mitoTEMPO (10  $\mu$ M). (E) *Retnla* promoter activity in transfected MH-S cells treated with vehicle or GGOH. mRNA expression for (F) *Retnla* ( $n = 3$ ), (G) *Tnf* ( $n = 3$ ) and (H) *Nos2* ( $n = 3$ ) in transfected MH-S cells ( $n = 3$ ). mRNA expression for (I) *Chil3* ( $n = 3$ ), (J) *Arg1* ( $n = 3$ ), (K) *Tnf* ( $n = 3$ ) and (L) *Nos2* ( $n = 3$ ) in THP-1 cells expressing scramble or GGDPs siRNA and empty or Rac1 $_{WT}$ . \*\*,  $p < 0.001$ ; \*\*\*,  $p < 0.0001$ . Values shown as mean  $\pm$  S.E.M. One-way ANOVA followed by Tukey's multiple comparison test was utilized.

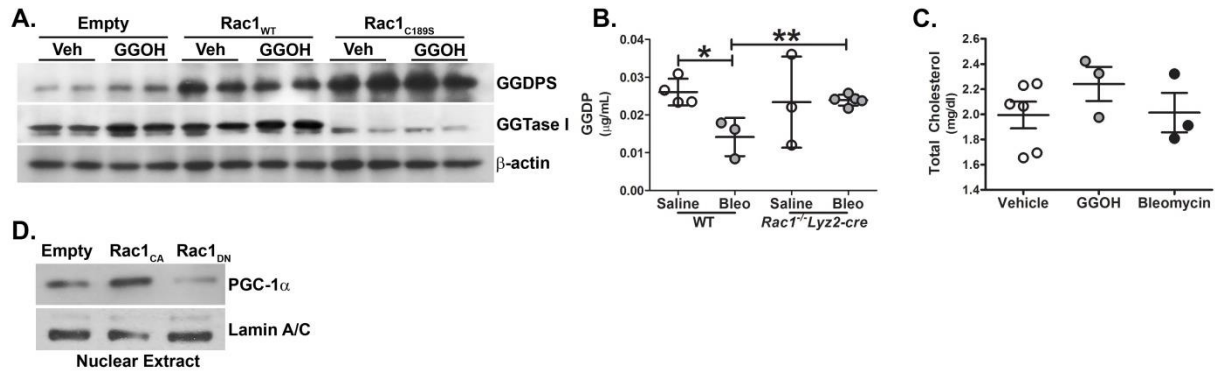

**Supplemental Figure 5. Inhibition of Rac1 geranylgeranylation increases GGDP levels in BAL cells.** (A) Immunoblot analysis in transfected MH-S cells treated with vehicle or GGOH. (B) GGDP levels in WT and *Rac1*<sup>-/-</sup>*Lyz2-cre* mice exposed to saline or bleomycin (WT, saline *n* = 4; WT, bleomycin *n* = 3; *Rac1*<sup>-/-</sup>*Lyz2-cre*, saline *n* = 3; *Rac1*<sup>-/-</sup>*Lyz2-cre*, bleomycin *n* = 5). (C) Total cholesterol levels in MH-S cells treated with vehicle, GGOH, or bleomycin (*n* = 3). (D) Immunoblot analysis in nuclear extract of THP-1 cells expressing constitutively active Rac1 (Rac1<sub>CA</sub>) or dominant negative Rac1 (Rac1<sub>DN</sub>). \*, *p* < 0.05; \*\*, *p* < 0.001. Values shown as mean ± S.E.M. One-way ANOVA followed by Tukey's multiple comparison test was utilized.

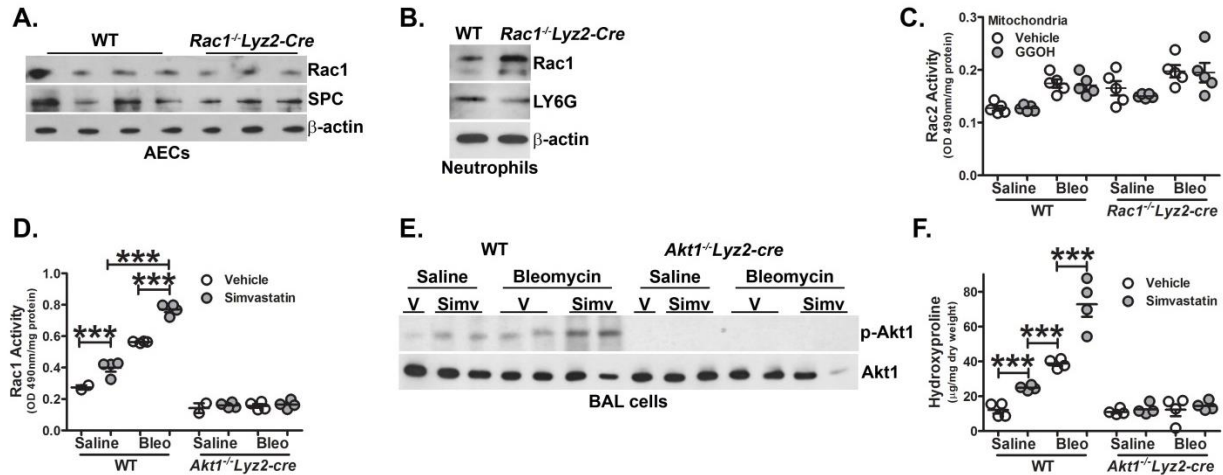

**Supplemental Figure 6. Rac1 is expressed in AECs from *Rac1<sup>-/-</sup>Lyz2-cre* mice.** Rac1 immunoblot analysis in (A) alveolar epithelial cells (AECs) and (B) neutrophils isolated from WT and *Rac1<sup>-/-</sup>Lyz2-cre* mice. (C) Ten days after exposure of WT and *Rac1<sup>-/-</sup>Lyz2-cre* mice to saline or bleomycin, pumps containing vehicle or GGOH were subcutaneously implanted; mice were sacrificed 11 days later. Rac2 activity in BAL cells ( $n = 5$ ). Ten days after exposure of WT or *Akt1<sup>-/-</sup>Lyz2-cre* mice to saline or bleomycin, daily i.p. injections of simvastatin (20 mg/kg/day) were performed. Mice were sacrificed 11 days later. (D) Rac1 activity and (E) immunoblot analysis was performed in isolated BAL cells ( $n = 2-4$  per group). (F) Hydroxyproline analysis ( $n = 4$  per group). \*\*\*,  $p < 0.0001$ . Values shown as mean  $\pm$  S.E.M. One-way ANOVA followed by Tukey's multiple comparison test was utilized.
